# Supplementary material for: Selectivity switching resulting in the formation of benzene by surface carbonates on ceria in catalytic gas-phase oxidation of benzyl alcohol
Source: Royal Society of Chemistry journal article supplement (doi:10.1039/c5cc08904b), 2015-12-24
Supplement: c5cc08904b1.pdf [file c5cc08904b1.pdf]

## Supporting information for

# Selectivity Switch into Formation of Benzene by Surface Carbonates on Ceria in Catalytic Gas-Phase Oxidation of Benzyl Alcohol

Yihu Dai,<sup>‡ac</sup> Xin-Ping Wu,<sup>‡b</sup> Yu Tang,<sup>a</sup> Yanhui Yang,<sup>c</sup> Xue-Qing Gong,<sup>\*b</sup> and Jie Fan<sup>\*a</sup>

<sup>a</sup>Key Lab of Applied Chemistry of Zhejiang Province, Department of Chemistry, Zhejiang University, Hangzhou 310027, People's Republic of China

<sup>b</sup>Key Laboratory for Advanced Materials, Centre for Computational Chemistry and Research Institute of Industrial Catalysis, East China University of Science and Technology, Shanghai 200237, People's Republic of China

<sup>c</sup>School of Chemical and Biomedical Engineering, Nanyang Technological University, Singapore 637459, Singapore

<sup>‡</sup>Equal contribution for this work.

## Experimental Details

### Material Synthesis and Treatment

In a typical synthesis, 10 mmol of  $\text{Ce}(\text{NO}_3)_3 \cdot 6\text{H}_2\text{O}$ , 40 mmol of HOAc, 24 mmol of HCl, and 1.6 g of F127 ( $\text{EO}_{96}\text{PO}_{70}\text{EO}_{96}$ , MW = 12 000 g/mol) were dissolved in 30 mL of ethanol. The mixture was stirred vigorously for 2 h and transferred to a Petri dish (diameter 125 mm). The ethanol solution was evaporated at 40 - 60 °C with relative humidity of 30 - 80 %. After the solvent was evaporated, the mixture was transferred into a 65 °C oven and aged for 24 h. The as-synthesized mesostructured hybrids were calcined at 550 °C in air for 6 h (ramp rate 3 °C/min) to obtain the mesoporous  $\text{CeO}_2$  catalyst.

In order to eliminate the adsorbed  $\text{H}_2\text{O}$  species and hydroxyl groups on the  $\text{CeO}_2$  surface, the  $\text{CeO}_2$  catalyst was outgassed by a mechanical pump at 723 °C for 0.5 h and then treated in  $\text{O}_2$  at 600 °C for 24 h.<sup>1</sup> The outgassing process was repeated three times. The ex-situ IR spectrum and aerobic/anaerobic oxidation reaction of BA were proceeded after outgassing again at 723 °C for 30 min and cooling down in  $\text{N}_2$  flow. The  $\text{N}_2$  and  $\text{O}_2$  gases were dried with molecular sieve and silica gel. Most of surface hydroxyl groups and adsorbed  $\text{CO}_2$  molecules can be removed through this process, which is confirmed by FT-IR (Figure S21).

As reference sample,  $\text{CO}_2$ -treated meso- $\text{CeO}_2$  was prepared by calcination under 30 mL/min of  $\text{CO}_2$  flow at 240 °C for 36 h and  $\text{H}_2$ -reduced meso- $\text{CeO}_2$  was obtained by calcination under 30 mL/min of  $\text{H}_2$  flow at 550 °C for 6 h.

## Catalytic Reaction

Benzyl alcohol (99.8 %, from Sigma-Aldrich) was used without further purification. Pure oxygen gas was used as the oxidant. The oxidation was performed using a conventional continuous-flow fixed-bed glass vertical reactor (h = 150 mm, i.d. = 10 mm), fitted with a glass frit holding 0.2 - 0.5 g of catalysts. The catalyst was preheated at 110 °C for 1 h with oxygen flow. The reaction was started by charging benzyl alcohol into the reactor. The charging rates of benzyl alcohol (0.3 - 1.8 mL/h) and oxygen gas (0.5 - 20.0 mL/min) were controlled by a syringe pump and mass flow instrument, respectively. Liquid vaporization occurred on the reactor wall prior to the catalytic bed. Typical reaction temperature range was 203 - 300 °C. The liquid products and unreacted benzyl alcohol were collected by using a cold trap. The liquid products were periodically collected during the reaction and quantitatively analyzed by an Agilent gas chromatograph 6890 equipped with an HP-5 capillary column (30 m x 0.32 mm) and flame ionization detector (FID). The gas products were in-situ analyzed by a mass spectrometer (Hiden analytical QGA). Dodecane was the internal standard to calculate liquid product distributions. The analysis of benzene needs combining of GC-FID and in-situ MS because benzene is highly volatile. The carbon balance is greater than 95 % in all reactions.

For the anaerobic oxidation of BA, 20.0 mL/min of pure N<sub>2</sub> was used as carrier gas. 0.25 g of catalyst was pretreated in N<sub>2</sub> at given temperature (240 or 300 °C) for 1 h to remove residual air or water vapor before the anaerobic oxidation started. 0.4 mL/h of BA was controlled by a syringe pump. The products analysis is same as above.

## Device Characterization

The XRD patterns were analyzed by a Rigaku Ultimate IV with Cu K $\alpha$  radiation. The TEM and HR-TEM images of catalysts were recorded on a JEOL JEM 3010 at 300 kV. Nitrogen adsorption isotherms were measured on a Micromeritics ASAP 2020 adsorption analyzer at -196 °C, and samples were outgassed under vacuum at 200 °C before the adsorption analysis. The XPS measurements were performed in a VG Scientific ESCALAB Mark II spectrometer equipped with two ultrahigh vacuum (UHV) chambers. All binding energies were referenced to the C1s peak at 284.6 eV. The IR spectra were recorded on a Perkin-Elmer Spectrum One FTIR Spectrometer equipped with DTGS detector at room temperature with KBr pellets (4000 - 450 cm<sup>-1</sup>, resolution of 4 cm<sup>-1</sup>).

The Raman measurements were performed on a Labor Raman HR-800 with laser excitations at 514.5 nm. The total reaction feeding gas was fixed at 20 ml/min by mass-flow controller under shifted gas atmospheres and the programmed temperature rise was set in in-situ Raman experiments. The BA was introduced into in-situ cell by importing carry gas (O<sub>2</sub> or N<sub>2</sub>) to generate babble in pure BA liquid. The four sequent stages were O<sub>2</sub> for 40 min, O<sub>2</sub>+BA for 60 min, N<sub>2</sub>+BA for 240 min and O<sub>2</sub>+BA for 90 min, performed at 220, 240 and 260 °C, respectively. The samples were swept with pure N<sub>2</sub> at 200 °C to remove surface impurities before data record.

## Computational Details for DFT Calculations

Spin-polarized density functional theory (DFT) calculations corrected by London dispersion of DFT-D scheme<sup>2</sup> and on-site Coulomb interaction (DFT+U) were performed with the Perdew-Burke-Ernzerhof (PBE) functional by using the Vienna ab initio Simulation Package (VASP).<sup>3</sup> According to the previous study,<sup>4</sup> dispersion coefficient ( $C_6$ ) and vdW radii ( $R_0$ ) for Ce were set to 20.00 J nm<sup>6</sup> mol<sup>-1</sup> and 186.0 pm, respectively. Default values given by Grimme<sup>1</sup> were employed to  $C_6$  and  $R_0$  parameters of other elements. For the localized 4*f* electron, we used a Hubbard U of 5.0 eV.<sup>5</sup> Valence-core interaction was described by the project-augmented wave (PAW) method<sup>6</sup> at a kinetic energy cutoff of 400 eV with Ce (5s, 5p, 6s, 5d, 4f), O (2s, 2p), C (2s, 2p), and H (1s) shells being treated as valence electrons. The calculated lattice parameter is 5.440 Å, which is in good agreement with the experimental value of 5.411 Å.<sup>7</sup>

A 9 atomic layer slab with surface cell of 4×4 was used for the CeO<sub>2</sub>(111) surface. The bottom tri-layer was fixed in all calculations to estimate bulk parameters. A large vacuum gap (>10 Å) was used to avoid interactions between slabs.

For the Brillouin-zone integration, we used a 1×1×1 k-mesh. A larger k-mesh grid of 2×2×1 was also tested for the calculation of CO adsorption energies, and it has been found that 1×1×1 and 2×2×1 k-mesh grids give nearly identical results (Table S4), indicating that 1×1×1 k-mesh grid should be enough for the calculations in this work. Structure optimizations were performed until the forces on each ion were less than 0.02 eVÅ<sup>-1</sup>.

Adsorption energies of adsorbates ( $E_{ads}$ ) and oxygen vacancy formation energies ( $E_{ov}$ ) were calculated as follows:

$$E_{ads} = E_{ad} + E_{sub} - E_{ad/sub},$$

$$E_{ov} = 0.5E_{O_2} + E_{ov/sub} - E_{sub},$$

where  $E_{ad}$ ,  $E_{sub}$ ,  $E_{ad/sub}$ ,  $E_{O_2}$  and  $E_{ov/sub}$  are the DFT total energies of the gas-phase adsorbate, the substrate, the adsorption complex, gas-phase O<sub>2</sub> and the reduced substrate, respectively.

Thermodynamic analyses were based on calculating the surface free energy change per unit area ( $\Delta\gamma$ ):

$$\Delta\gamma(p, T) = \frac{1}{A} \left\{ G[CO_x/CeO_2](p, T) - G[CeO_2](p, T) - \mu[C](p, T) - \frac{n}{2} \mu[O_2](p, T) \right\},$$

where A is the area of one side of the surface cell,  $G[CO_x/CeO_2](p, T)$  and  $G[CeO_2](p, T)$  are the Gibbs free energy of carbonate species deposited CeO<sub>2</sub>(111) and clean CeO<sub>2</sub>(111), respectively,  $\mu[C](p, T)$  and  $\mu[O_2](p, T)$  are the chemical potentials of the carbon atom and gas-phase O<sub>2</sub>, respectively.

$\mu[O_2](p, T)$  can be calculated as following:

$$\frac{1}{2} \mu[O_2](p, T) = \frac{1}{2} E[O_2] + \Delta\mu[O](p, T) = \frac{1}{2} E[O_2] + \frac{1}{2} \left\{ H(p^0, T) - H(p^0, 0K) - TS(p^0, T) + K_B T \ln \frac{p}{p^0} \right\}.$$

In addition, Gibbs free energies of the solid components can be equal to the DFT total energies and  $\mu[C](p, T)$  can be equal to the DFT total energy of the C atom ( $E[C]$ ). Accordingly, we obtained the following equation:

$$\Delta\gamma(p, T) = \frac{1}{A} \left\{ E[CO_x/CeO_2] - E[CeO_2] - E[C] - \frac{n}{2} E[O_2] \right. \\ \left. - \frac{n}{2} \left\{ H(p^0, T) - H(p^0, 0K) - TS(p^0, T) + K_B T \ln \frac{p}{p^0} \right\} \right\}$$

### Structure information of carbonate species on CeO<sub>2</sub>(111)

Five stable structures A-E are discussed in this work. Structure B can be regarded as a bent CO<sub>2</sub> attached to CeO<sub>2</sub>(111). Structures A and C have similar CO<sub>3</sub> groups with structure B, and the only difference among these three structures is the local structure near the CO<sub>3</sub> group as it is a surface O atom, O<sub>2</sub><sup>2-</sup> or O vacancy beside. Structure D occurs in the way that a carbon atom sits on top of one sub-surface O of clean CeO<sub>2</sub>(111). The carbon then binds with three neighboring top-surface O atoms to form the CO<sub>3</sub> group, which also brings drastic distortion to the surface bonds of these O. Structure E occurs as the result of formation of a sub-surface O vacancy at structure D. Charge analyses indicated that two, four and six Ce<sup>3+</sup> are generated at structures C, D and E, respectively. Side views of structures A-E are in Figure S14. Ce<sup>3+</sup> patterns of structures C, D and E are shown in Figure S15.

### References

- (1) C. Li, Y. Sakata, T. Arai, K. Domen, K. I. Maruya and T. Onishi, *J. Chem. Soc., Faraday Trans.*, **1989**, *85*, 929-943.
- (2) S. Grimme *J. Comput. Chem.* **2006**, *27*, 1787-1799.
- (3) (a) G. Kresse and J. Furthmüller, *J. Comput. Mater. Sci.* **1996**, *6*, 15-50; (b) G. Kresse and J. Hafner, *Phys. Rev. B* **1994**, *49*, 14251-14269.
- (4) C. Penschke, J. Paier and J. Sauer, *J. Phys. Chem. C* **2013**, *117*, 5274-5285.
- (5) (a) M. Nolan, S. C. Parker and G. W. Watson, *Surf. Sci.* **2005**, *595*, 223-232; (b) Nolan, M.; Grigoleit, S.; Sayle, D. C.; Parker, S. C.; Watson, G. W. *Surf. Sci.* **2005**, *576*, 217-229.
- (6) P. E. Blöchl, *Phys. Rev. B* **1994**, *50*, 17953-17979.
- (7) E. A. Kümmerle and G. Heger, *J. Solid. State Chem.* **1999**, *147*, 485-500.

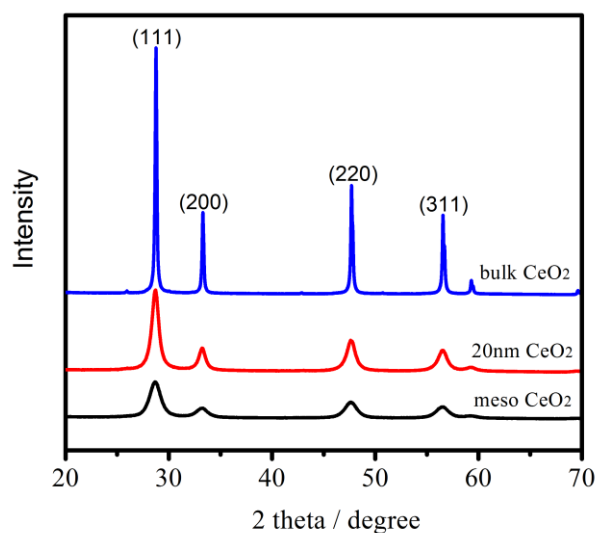

Figure S1. Wide-angle X-ray diffraction patterns of as-prepared mesoporous  $\text{CeO}_2$ , commercial 20 nm  $\text{CeO}_2$  (from Sigma), and commercial bulk  $\text{CeO}_2$  (from Sigma).

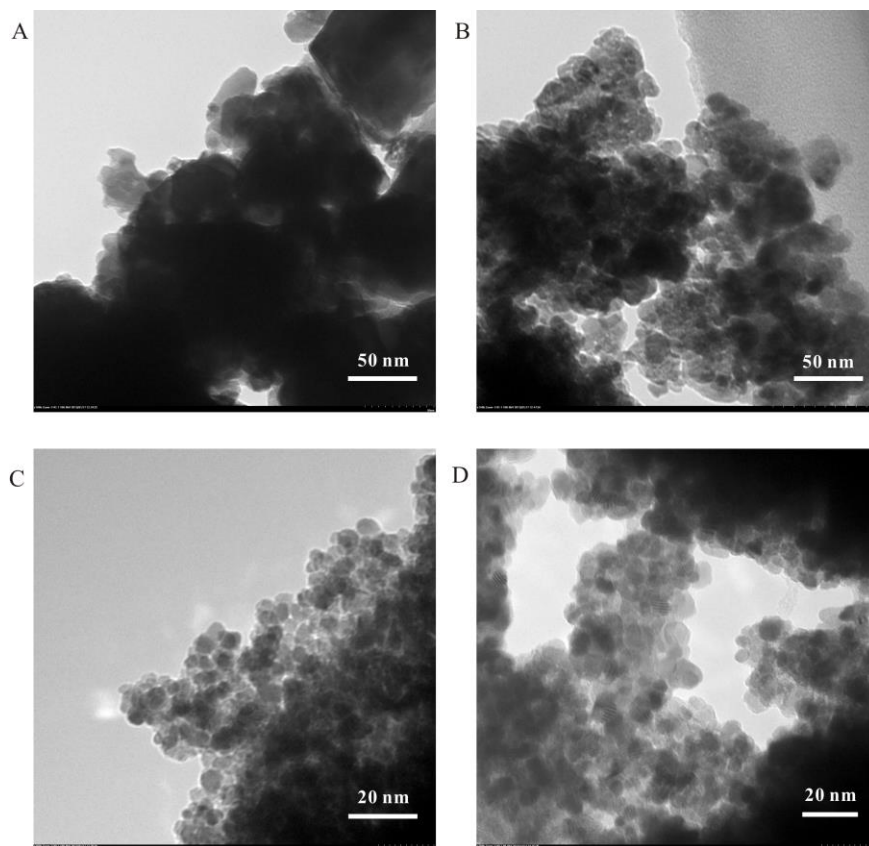

Figure S2. TEM images of (A) commercial bulk  $\text{CeO}_2$ , (B) commercial 20 nm  $\text{CeO}_2$ , and (C, D) as-prepared mesoporous  $\text{CeO}_2$ .

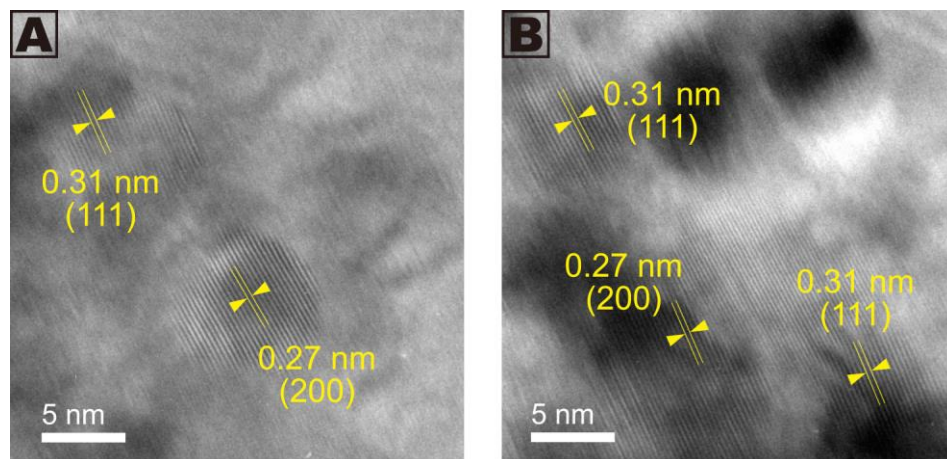

Figure S3. HR-TEM images of as-prepared mesoporous CeO<sub>2</sub> catalyst.

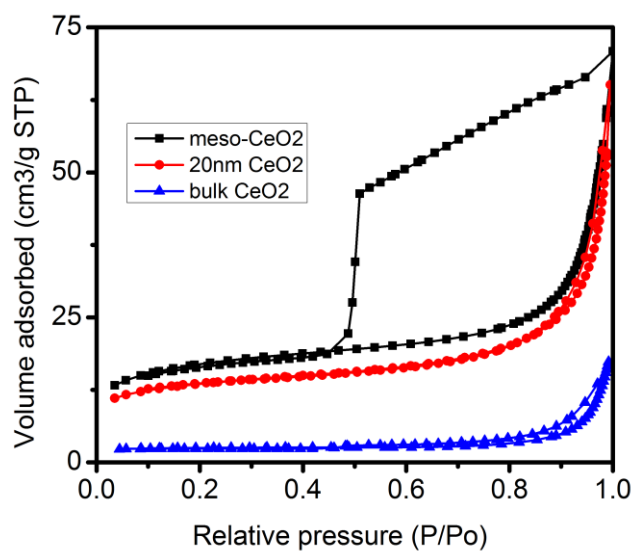

Figure S4. Nitrogen sorption isotherms of as-prepared mesoporous CeO<sub>2</sub>, commercial 20 nm CeO<sub>2</sub>, and commercial bulk CeO<sub>2</sub>.

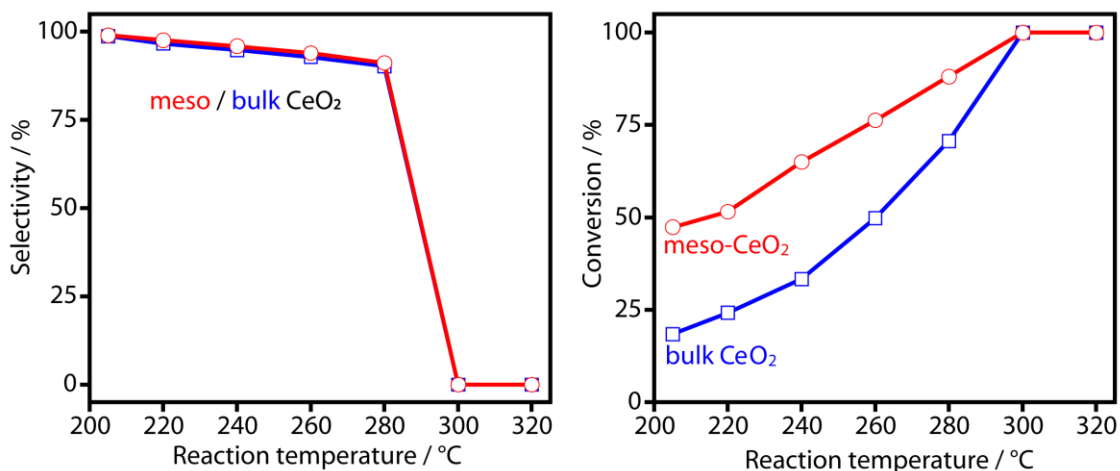

Figure S5. The selectivity toward BAD and conversion of BA as a function of the reaction temperature. Reaction conditions: catalyst = 0.3 g, BA = 0.3 mL/h, and  $\text{O}_2$  = 20 mL/min.

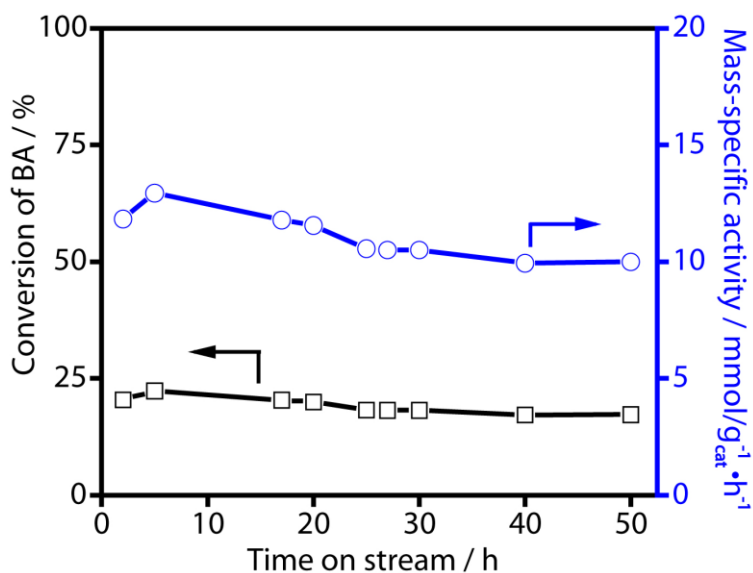

Figure S6. Reaction stability of meso- $\text{CeO}_2$  catalyst for a long-term reaction towards selective gas-phase oxidation of BA. Reaction conditions: catalyst = 0.2 g, BA = 1.0 mL/h, and  $\text{O}_2$  = 20 mL/min, at 240 °C.

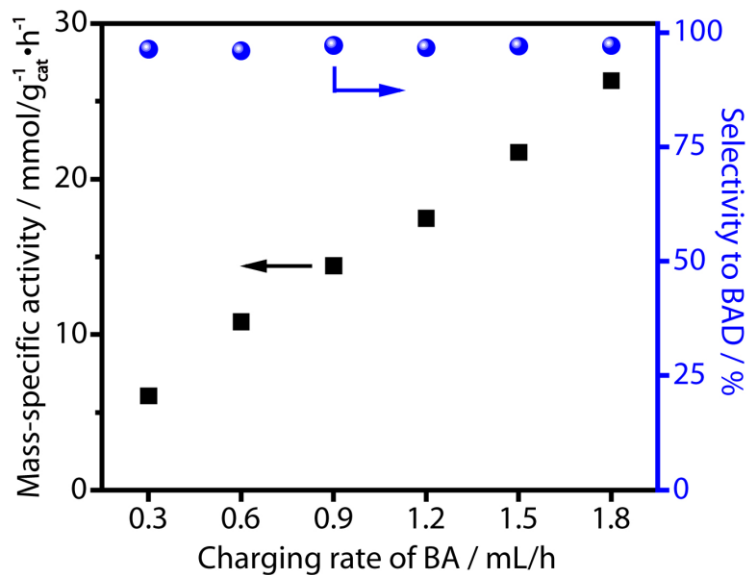

Figure S7. The selectivity toward BAD and mass-specific activity as a function of the charging rate of BA. Reaction conditions: catalyst, 0.3 g; BA, 0.3 - 1.8 mL/h; O<sub>2</sub>, 20.0 mL/min; temperature, 240 °C.

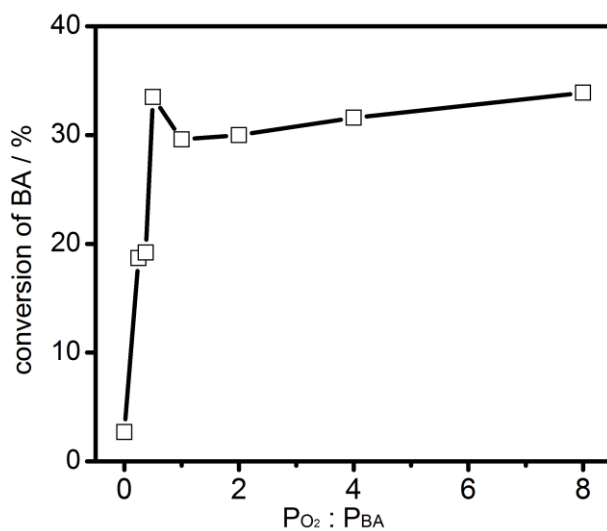

Figure S8. The conversion of BA as a function of partial pressure of O<sub>2</sub> for BA oxidation reaction. Reaction temperature is 240 °C.



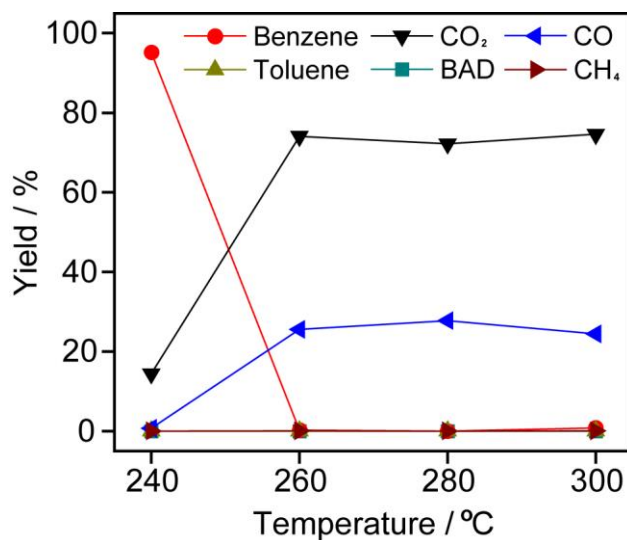

Figure S9. The yields of products in BA aerobic oxidation over CO<sub>3</sub>-CeO<sub>2</sub> (meso-CeO<sub>2</sub> catalyst after 36 h of anaerobic oxidation of BA at 240 °C) as a function of the reaction temperature. Reaction conditions: catalyst = 0.25 g, BA = 0.4 mL/h, and O<sub>2</sub> = 15.0 mL/min.

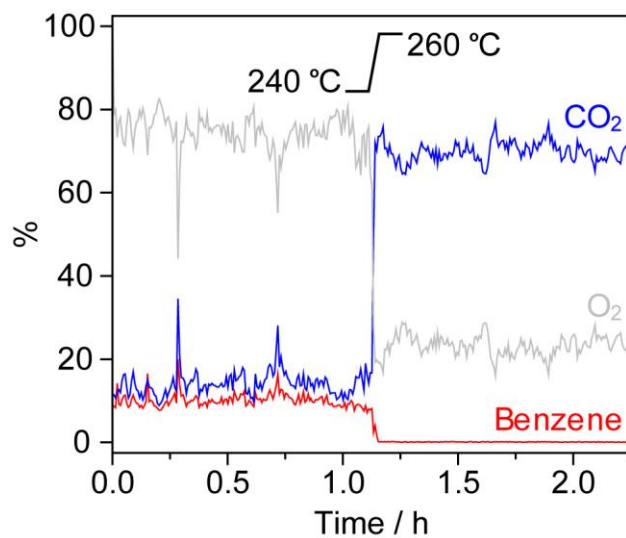

Figure S10. The generation of benzene/CO<sub>2</sub> at 240 °C and the change of benzene-to-CO<sub>2</sub> at 260 °C were obtained on meso-CeO<sub>2</sub> catalyst after 36 h of anaerobic oxidation of BA at 240 °C. Reaction conditions: catalyst = 0.25 g, BA = 0.4 mL/h, and O<sub>2</sub> = 15.0 mL/min.

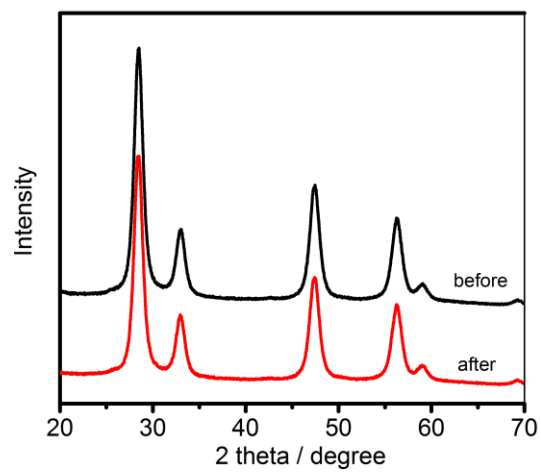

Figure S11. The XRD patterns of meso-CeO<sub>2</sub> catalyst before and after anaerobic (in pure N<sub>2</sub>) gas-phase reaction of BA at 240 °C.

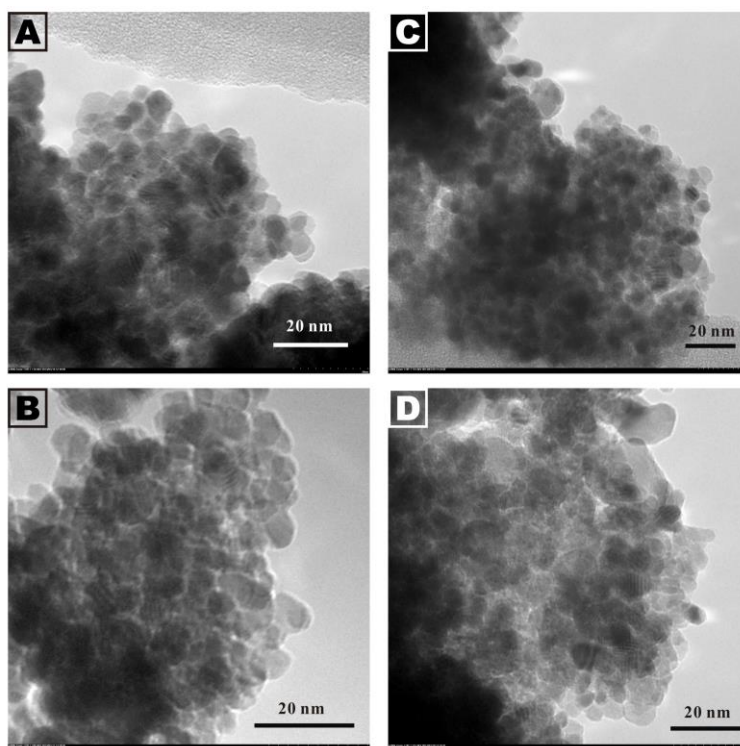

Figure S12. The TEM images of meso-CeO<sub>2</sub> catalyst (A-B) before and (C-D) after anaerobic (in pure N<sub>2</sub>) gas-phase reaction of BA at 240 °C.

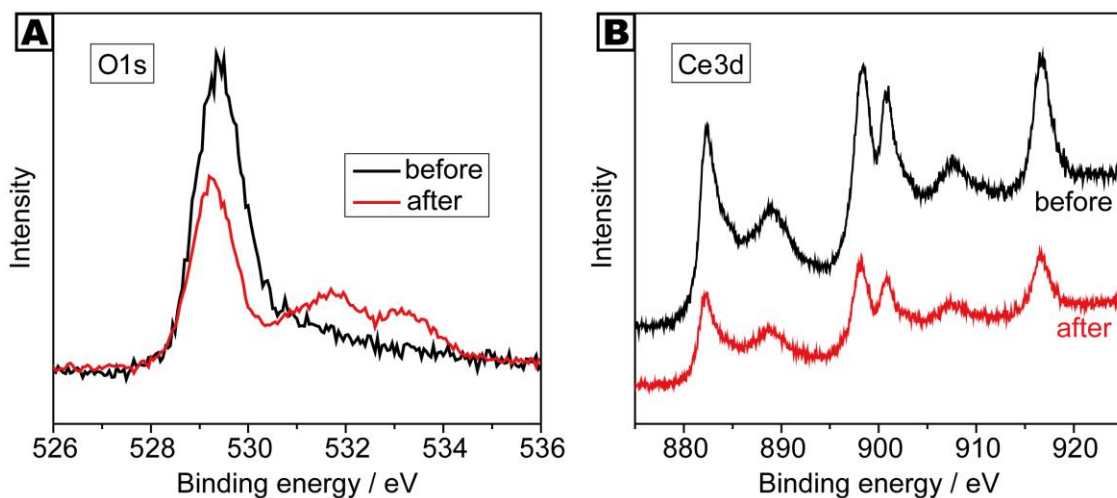

Figure S13. The XPS (A) O1s and (B) Ce3d spectra of meso-CeO<sub>2</sub> catalyst before and after gas-phase anaerobic (in N<sub>2</sub>) reaction of BA at 240 °C.

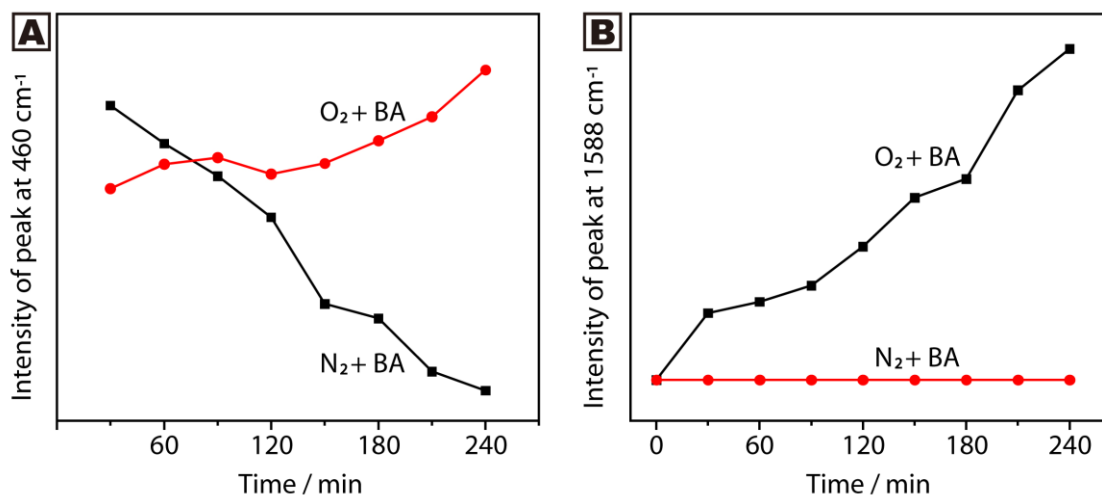

Figure S14. The intensity of Raman peak at 460 cm<sup>-1</sup> (A) and 1588 cm<sup>-1</sup> (B) as a function of reaction time under aerobic and anaerobic oxidation of BA at 240 °C for 240 min.

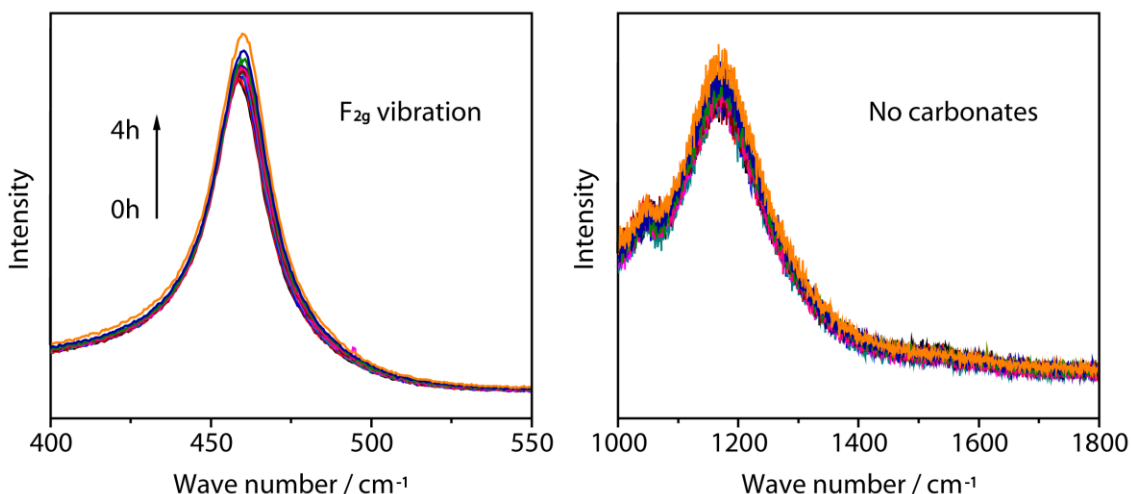

Figure S15. In-situ Raman spectra recorded during BA oxidation process over meso-CeO<sub>2</sub> catalyst in aerobic condition (O<sub>2</sub> + BA) at 240 °C for 240 min.

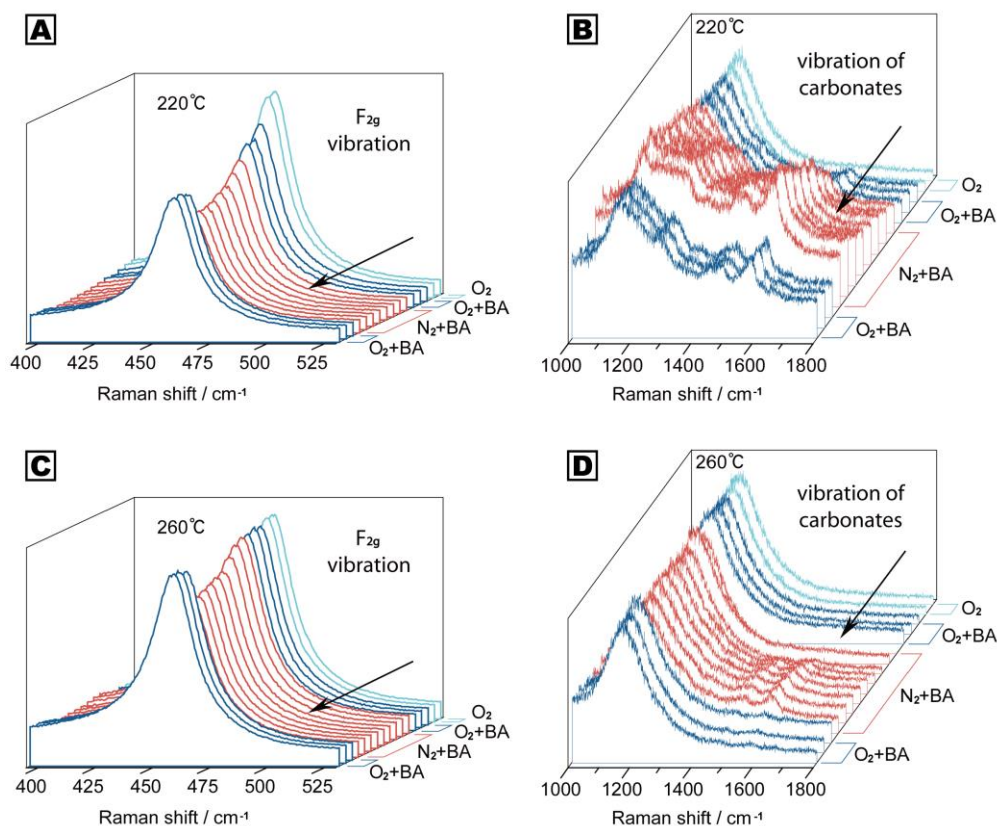

Figure S16. In-situ Raman spectra recorded during BA oxidation over meso-CeO<sub>2</sub> catalyst in four reaction conditions with gaseous atmospheres switched from pure O<sub>2</sub> (stage 1), O<sub>2</sub> + BA (stage 2), and N<sub>2</sub> + BA (stage 3) to O<sub>2</sub> + BA (stage 4). A and C present F<sub>2g</sub> vibration situation of CeO<sub>2</sub> at 220 °C and 260 °C, respectively, while B and D displays vibration of OCO group on CeO<sub>2</sub> surface at 220 °C and 260 °C, respectively.

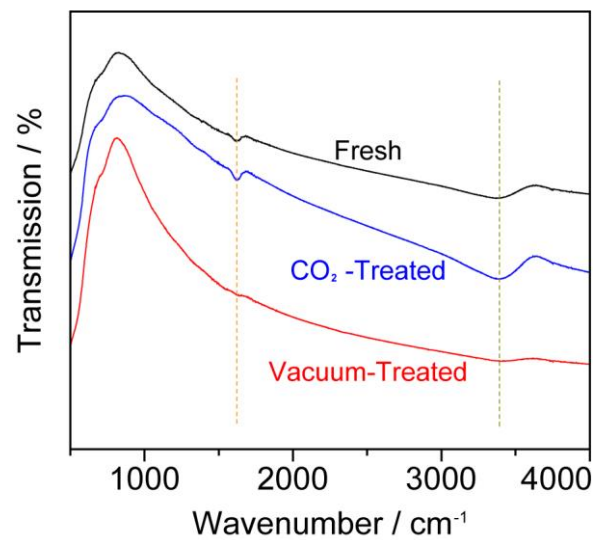

Figure S17. The FT-IR spectra of fresh, CO<sub>2</sub>-treated and high-temperature vacuum-treated meso-CeO<sub>2</sub> catalysts.

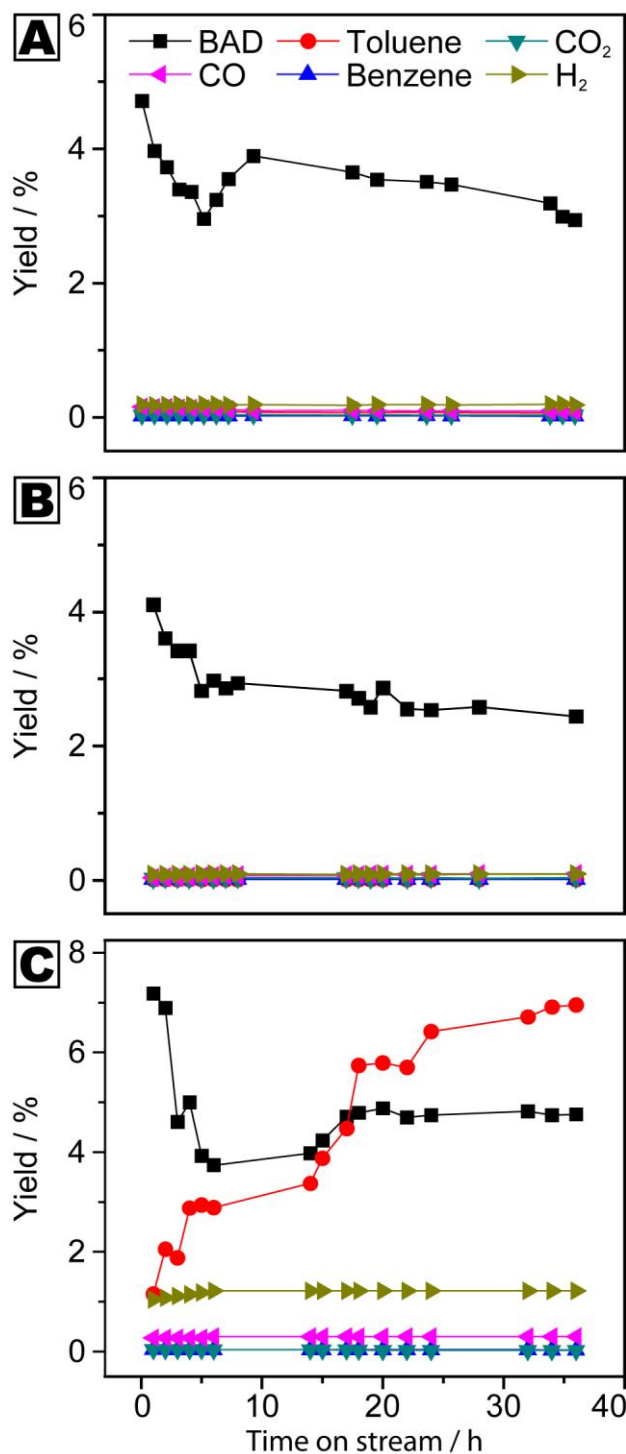

Figure S18. The product yields in anaerobic oxidation of BA over (A) meso-CeO<sub>2</sub> catalyst at 240 °C; (B) high-temperature vacuum-treated meso-CeO<sub>2</sub> catalyst at 240 °C; (C) meso-CeO<sub>2</sub> catalyst at 300 °C. Reaction conditions: catalyst, 0.25 g; BA, 0.4 mL/h; N<sub>2</sub>, 20.0 mL/min. The yields of methane were all less than 0.01 % in three processes.

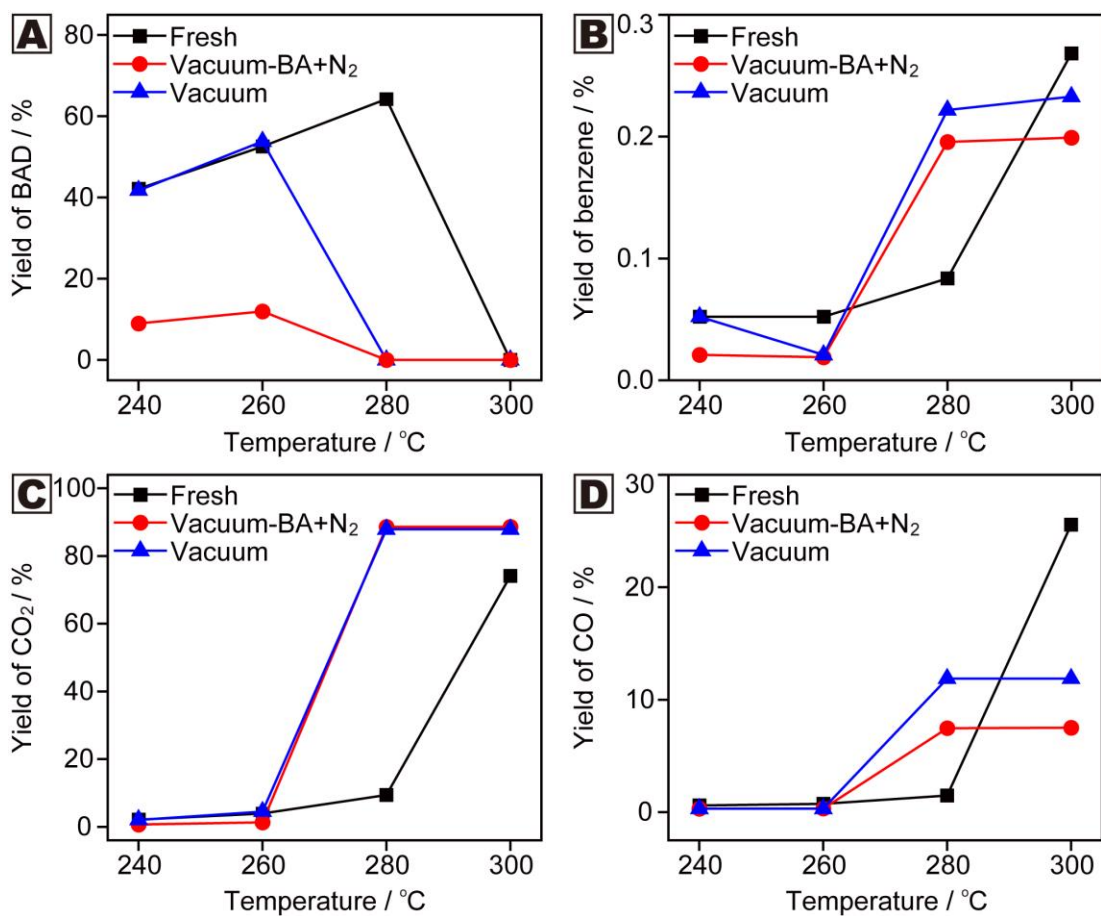

Figure S19. The catalytic performances (the yields of (A) BAD; (B) benzene; (C) CO<sub>2</sub> and (D) CO) in aerobic oxidation of BA over fresh meso-CeO<sub>2</sub> catalyst (Fresh), high-temperature vacuum-treated meso-CeO<sub>2</sub> catalysts before (Vacuum) and after (Vacuum-BA+N<sub>2</sub>) aerobic oxidation process of BA at 240 °C for 36 h. Reaction conditions: catalyst, 0.25 g; BA, 0.4 mL/h; O<sub>2</sub>, 15.0 mL/min. The yields of methane and toluene were all less than 0.1 % for three catalysts.

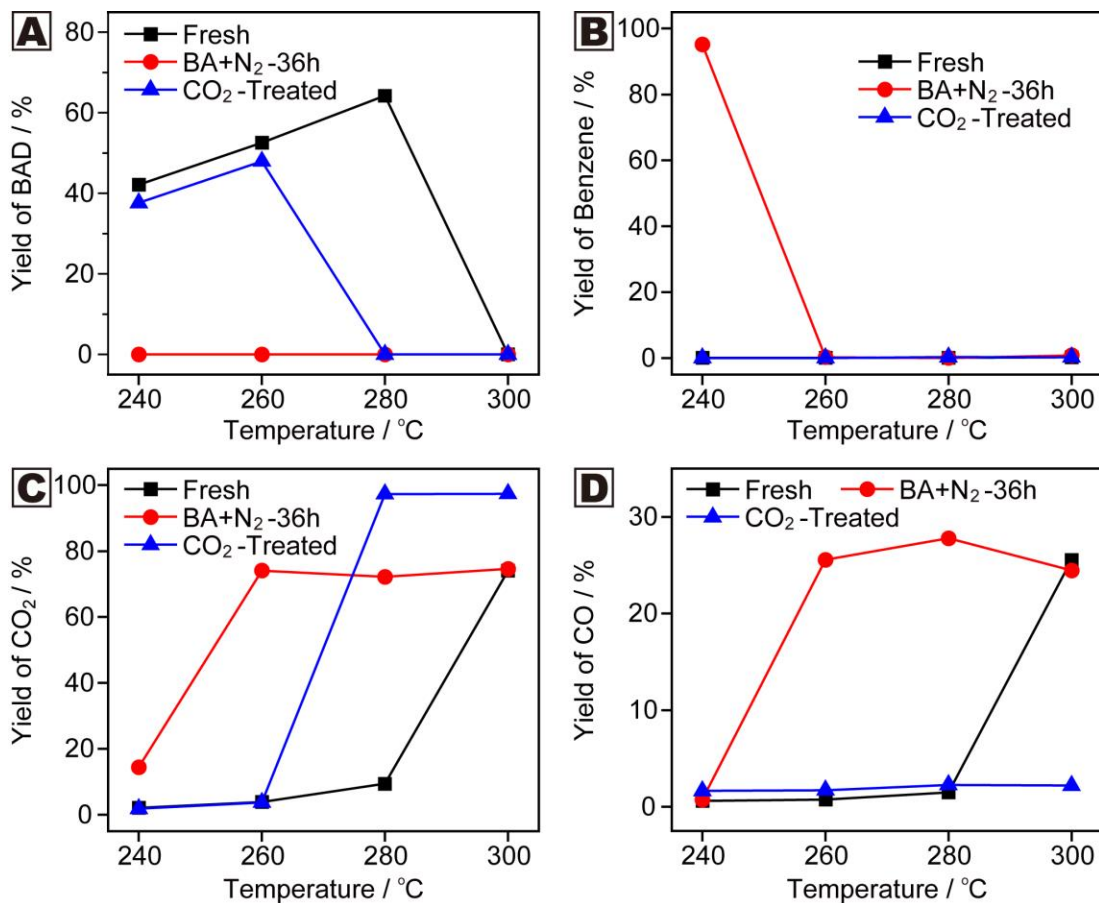

Figure S20. The catalytic performances (Yields of (A) BAD; (B) benzene; (C) CO<sub>2</sub> and (D) CO) in aerobic oxidation of BA over fresh meso-CeO<sub>2</sub> catalyst (Fresh), meso-CeO<sub>2</sub> catalyst after 36 h of CO<sub>2</sub> adsorption at 240 °C (CO<sub>2</sub>-treated) and meso-CeO<sub>2</sub> catalyst after 36 h of anaerobic oxidation process at 240 °C (BA-N<sub>2</sub>-36h). Reaction conditions: catalyst, 0.25 g; BA, 0.4 mL/h; O<sub>2</sub>, 15.0 mL/min. The yields of methane and toluene were all less than 0.1 % for three catalysts.



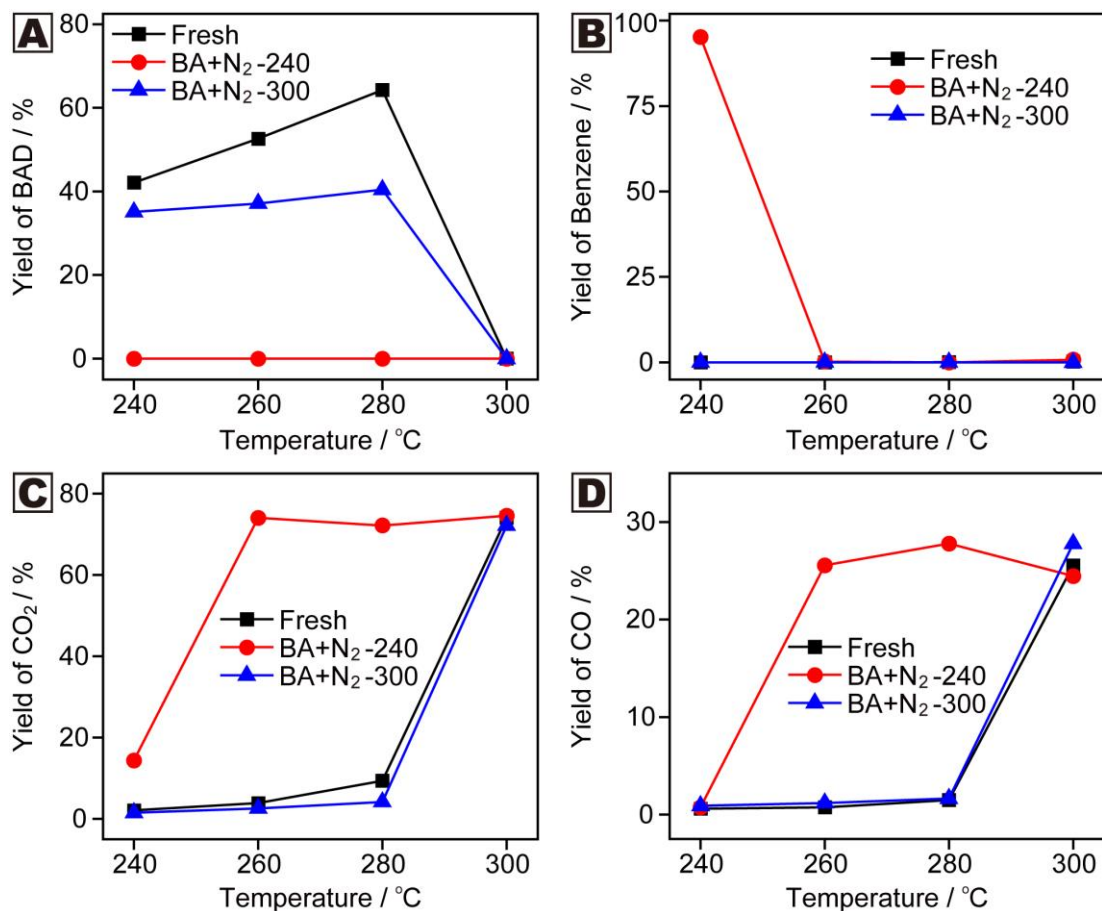

Figure S21. The catalytic performances (the yields of (A) BAD; (B) benzene; (C) CO<sub>2</sub> and (D) CO) in aerobic oxidation of BA over fresh meso-CeO<sub>2</sub> catalyst (Fresh), meso-CeO<sub>2</sub> catalyst after 36 h of anaerobic oxidation process at 240 °C (BA+N<sub>2</sub>-240) or 300 °C (BA+N<sub>2</sub>-300) respectively. Reaction conditions: catalyst, 0.25 g; BA, 0.4 mL/h; O<sub>2</sub>, 15.0 mL/min. The yields of methane and toluene were all less than 0.1 % for three catalysts.

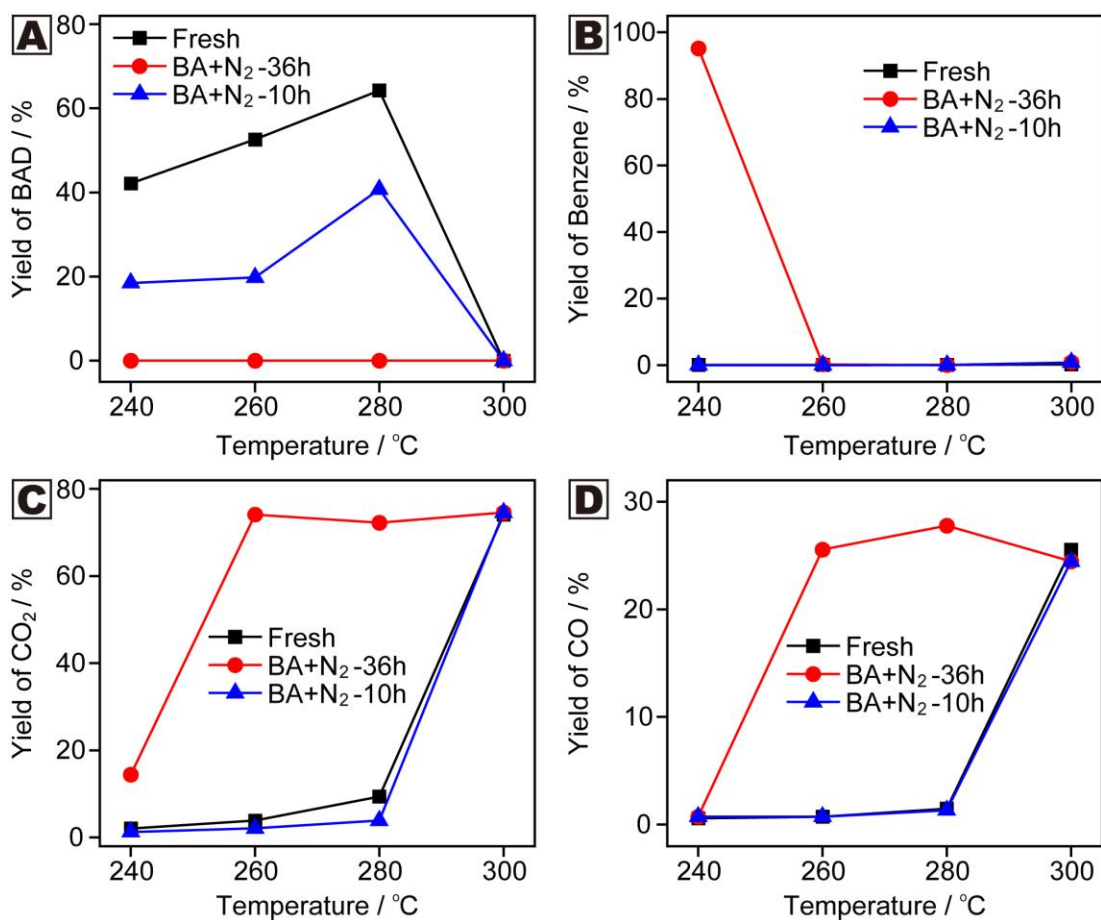

Figure S22. The catalytic performances (the yields of (A) BAD; (B) benzene; (C) CO<sub>2</sub> and (D) CO) in aerobic oxidation of BA over fresh meso-CeO<sub>2</sub> catalyst (Fresh), meso-CeO<sub>2</sub> catalyst after anaerobic oxidation process at 240 °C for 10 h (BA+N<sub>2</sub>-10h) or 36 h (BA+N<sub>2</sub>-36h), respectively. Reaction conditions: catalyst, 0.25 g; BA, 0.4 mL/h; O<sub>2</sub>, 15.0 mL/min. The yields of methane and toluene were all less than 0.1 % for three catalysts.

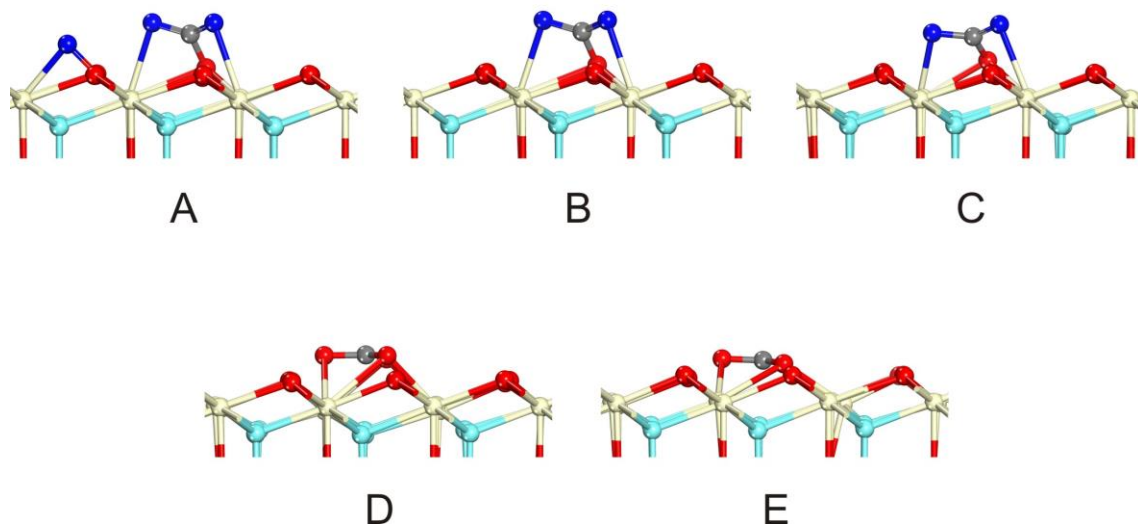

Figure S23. Side views of calculated structures A-E.

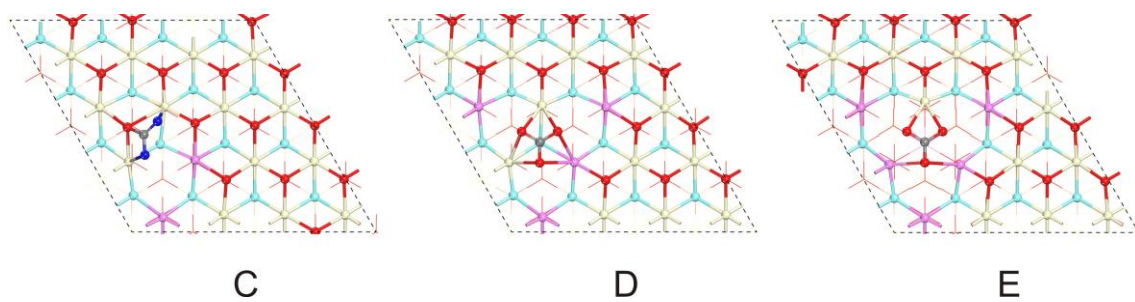

Figure S24.  $\text{Ce}^{3+}$  distributions of structures C, D and E.  $\text{Ce}^{3+}$  are pink colored.

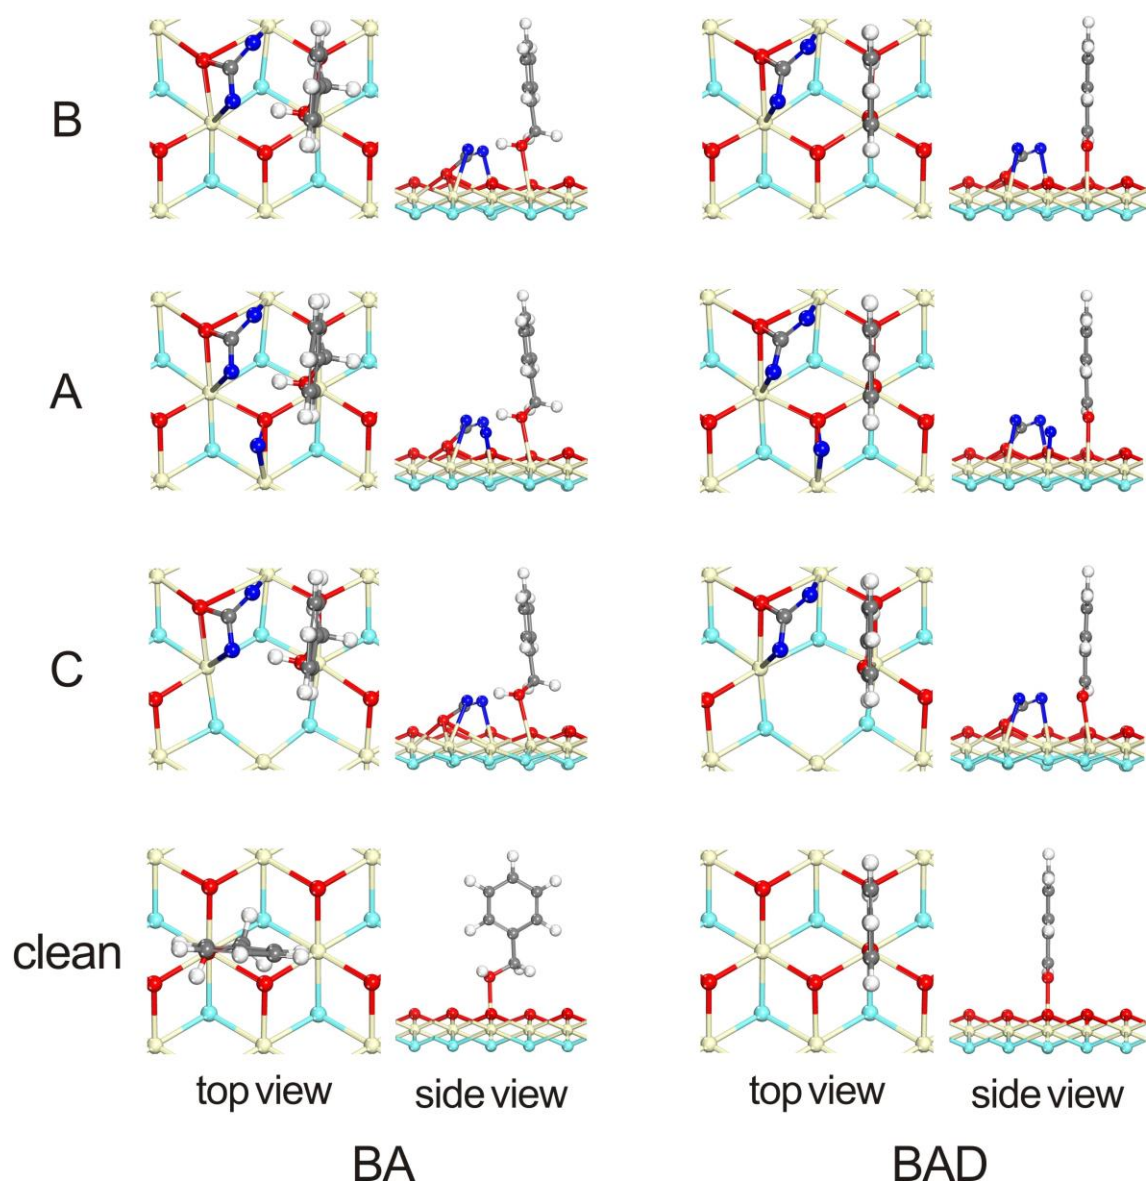

Figure S25. Calculated adsorption structures of BA and BAD at structures B, A, C and clean CeO<sub>2</sub>(111). H atoms are in white.

Table S1 Comparison of the catalytic activity of various catalysts (except of Au, Pd, Pt and Ru) in gas-phase selective oxidation of benzyl alcohol.

| Catalyst                 | Reaction Temperature (°C) | Benzaldehyde Selectivity (%) | Specific Activity (mmol·g <sub>cat</sub> <sup>-1</sup> ·h <sup>-1</sup> ) | Reference                                                          |
|--------------------------|---------------------------|------------------------------|---------------------------------------------------------------------------|--------------------------------------------------------------------|
| 3K-Cu-50TiO <sub>2</sub> | 210                       | >98                          | ~6                                                                        | <i>J. Am. Chem. Soc.</i> <b>2009</b> , <i>131</i> , 15568-15569    |
| meso-CeO <sub>2</sub>    | 240                       | 95                           | 26                                                                        | <b>This work</b>                                                   |
| 1.0%-V-CeO <sub>2</sub>  | 243                       | >98                          | ~25                                                                       | <i>J. Phys. Chem. C</i> <b>2014</b> , <i>118</i> , 24950-24958     |
| Ag/Ni-Microfiber         | 300                       | 97                           | 179                                                                       | <i>Appl. Catal. B. Environ.</i> <b>2010</b> , <i>99</i> , 222-228  |
| Ag-HMS-25                | 310                       | 96                           | 0.7                                                                       | <i>Micropor. Mesopor. Mat.</i> <b>2012</b> , <i>149</i> , 158-165  |
| 1%-Ag/SiO <sub>2</sub>   | 320                       | >99                          | 155                                                                       | <i>J. Catal.</i> <b>2005</b> , <i>234</i> , 308-317                |
| K-Co/NaUSY               | 350                       | 99                           | 86                                                                        | <i>J. Mol. Catal. A-Chem.</i> <b>2006</b> , <i>259</i> , 108-115   |
| Rb-Ce-NaZSM-5            | 400                       | 79                           | 19                                                                        | <i>Phys. Chem. Chem. Phys.</i> , <b>1999</b> , <i>1</i> , 373-381  |
| Cu-NaZSM-5               | 400                       | 84                           | 101                                                                       | <i>J. Catal.</i> <b>1995</b> , <i>153</i> , 254-264                |
| K-La/NaZSM-5             | 430                       | 98                           | 59                                                                        | <i>J. Mol. Catal. A-Chem.</i> , <b>2004</b> , <i>211</i> , 219-226 |

Table S2. Textural parameters of as-prepared mesoporous CeO<sub>2</sub>, commercial 20 nm CeO<sub>2</sub>, and commercial bulk CeO<sub>2</sub>.

| Sample                | Crystal size (nm) | Particle size (nm) | Pore size (nm) | Surface area (m <sup>2</sup> /g) | Pore volume (cm <sup>3</sup> /g) |
|-----------------------|-------------------|--------------------|----------------|----------------------------------|----------------------------------|
| meso-CeO <sub>2</sub> | 7.4               | 8                  | 4.2            | 56.3                             | 0.084                            |
| 20nm CeO <sub>2</sub> | 25.2              | 30                 | ---            | 44.3                             | 0.074                            |
| bulk CeO <sub>2</sub> | ---               | ---                | ---            | 7.8                              | 0.023                            |

Table S3. The second highest frequencies  $\nu_{\text{sym}}(\text{OCO})$  of structures A-E.

| A                     | B                     | C                     | D                     | E                     |
|-----------------------|-----------------------|-----------------------|-----------------------|-----------------------|
| 1243 cm <sup>-1</sup> | 1247 cm <sup>-1</sup> | 1240 cm <sup>-1</sup> | 1356 cm <sup>-1</sup> | 1381 cm <sup>-1</sup> |

Table S4. Calculated CO adsorption energies (eV) at structures B, A, C and the clean CeO<sub>2</sub>(111) with 1×1×1 and 2×2×1 k-mesh grids.

|       | Structure B | Structure A | Structure C | Clean surface |
|-------|-------------|-------------|-------------|---------------|
| 1×1×1 | 1.73        | 1.53        | 1.76        | 0.50          |
| 2×2×1 | 1.73        | 1.59        | 1.74        | 0.48          |
